# Supplementary material
Source: Springer Nature journal article supplement (https://www.springermedizin.de/resource/supplementary/12889_2012_5212_MOESM4_ESM.pdf/9495550)

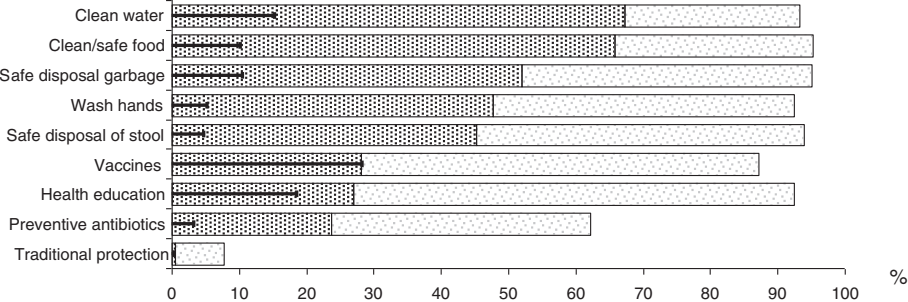

▣ *most important*

▣ *spontaneous*

▣ *probed*

Supplement: MOESM4 [file 9495550]
